# Supplementary material for: Next-Generation Sequencing Reveals Significant Bacterial Diversity of Botrytized Wine
Source: PLoS One. 2012 May 1;7(5):e36357. doi: 10.1371/journal.pone.0036357 (PMC3341366; doi:10.1371/journal.pone.0036357)
Supplement: Table S3 — Sequencing Raw Read and Quality Filtration Statistics. (XLS) [file pone.0036357.s005.xls]

## Sheet: Sheet1
Table S3. Sequencing Raw Read and Quality Filtration Statistics
	V4 5'		V4 3'		V5 5'		V5 3'
	N	%	N	%	N	%	N	%
Raw sequences	21959122	-	17959122	-	9539498	-	9539498	-
Barcode not in mapping file	17677852	80.5035	14463513	80.5357	8887527	93.1656	8887527	93.1656
Read too short following truncation	87448	0.398231	148746	0.828248	172230	1.80544	473944	4.96823
Ambiguous base calls exceed limit	56596	0.257733	37990	0.211536	1022	0.0107134	86497	0.906725
Total after quality filtration	4137226	18.8406	3308873	18.4245	478719	5.01828	91530	0.959484
