# Supplementary material for: Next-Generation Sequencing Reveals Significant Bacterial Diversity of Botrytized Wine
Source: PLoS One. 2012 May 1;7(5):e36357. doi: 10.1371/journal.pone.0036357 (PMC3341366; doi:10.1371/journal.pone.0036357)
Supplement: Table S5 — BAS genus-level taxonomy for V4 3′ reads. (XLS) [file pone.0036357.s007.xls]

Table S5: BAS genus-level taxonomy for V4 3� reads																											
																											
Batch	1	1	2	2	3	2	1	1	3	2	P	P	4	4	4	4	4	4	4	4	4	4	4	4	5	5	5
Age (wk)	11	6	11	6	17	19	19	51	51	51	0	0	10	17	21	59	26	1	64	38	49	32	9	12	19	6	51
Bacteria;Actinobacteria;Actinobacteria;Actinomycetales;Microbacteriaceae;Other	0.000499778	0.000968506	0.001910585	0.001471875	0.002833692	0.00182627	0.000280674	0.00066515	0.003283061	0.000953252	0.001120448	0.006569943	0.00092452	0.000518001	0.000719942	0.000166145	7.83E-05	0.000385733	7.77E-05	0.00013732	7.38E-05	0.000106367	0.000339779	0.00051062	0.001012875	0.00271388	0.0008805
Bacteria;Actinobacteria;Actinobacteria;Actinomycetales;Other;Other	0.001610395	0.001147859	0.01324672	0.005449916	0.010846199	0.010536174	0.005573376	0.00182041	0.005181081	0.00369862	0.009337068	0.007664933	0.003037707	0.008201675	0.005399568	0.002381414	0.002113574	0.003005131	0.002885907	0.001655465	0.001746123	0.00349491	0.004407425	0.004552121	0.001935716	0.002498492	0.00188482
Bacteria;Actinobacteria;Actinobacteria;Bifidobacteriales;Bifidobacteriaceae;Bifidobacterium	0.008366652	0.007496951	0.02152592	0.009945103	0.010455345	0.008007492	0.008179631	0.009137056	0.008566738	0.00751163	0.034173669	0.054749521	0.015980981	0.016144349	0.022678186	0.00935951	0.017221713	0.019833866	0.009057307	0.01114578	0.009935689	0.012277769	0.017377291	0.021402575	0.006414874	0.008400103	0.009300278
Bacteria;Actinobacteria;Actinobacteria;Coriobacteriales;Coriobacteriaceae;Other	0.000388716	0.000358706	0.001146351	0.000159122	0.000341997	0.00037462	0.00032077	0.000350079	0.000410383	0.000571951	0.001493931	0.003011224	0.000660371	0.000777001	0.000959923	0.000276909	0.000592695	0.000789408	0.000366288	0.000427217	0.000282823	0.000531834	0.000669851	0.000706176	0.000360133	0.000301542	0.000454008
Bacteria;Actinobacteria;Actinobacteria;Other;Other;Other	0.022323412	0.018293995	0.048910967	0.023669345	0.025307798	0.021306486	0.018845229	0.022335025	0.021186006	0.020208953	0.085714286	0.139337531	0.037839266	0.041353708	0.058435325	0.021931161	0.04033683	0.047086368	0.024563507	0.026601872	0.026339412	0.046132807	0.041453091	0.05259384	0.017286396	0.021711036	0.022535289
Bacteria;Bacteroidetes;Bacteroidia;Bacteroidales;Bacteroidaceae;Bacteroides	0.004572042	0.003945764	0.011081391	0.005609038	0.005423099	0.003605713	0.004450682	0.004375985	0.004821997	0.004118051	0.024463119	0.037229674	0.007924454	0.010619011	0.016078714	0.004319774	0.008812149	0.011419498	0.005694116	0.005866602	0.005213777	0.014997721	0.009785648	0.012439568	0.003803907	0.004480055	0.004911537
Bacteria;Bacteroidetes;Flavobacteria;Flavobacteriales;Flavobacteriaceae;Other	0.000296165	0.001327211	0.002802191	0.003381335	0.001465703	0.001919925	0.001443464	0.00213548	0.006104442	0.002974148	0.000560224	0.002737476	0	0.000604334	0.000599952	0.003129067	0.000257207	0.000197352	0.003252195	0.000488248	0.001131291	0.000379881	0.000427151	0.000228149	0.003578824	0.001680021	0.001472085
Bacteria;Firmicutes;Bacilli;Bacillales;Bacillaceae;Other	7.40E-05	0.000394576	0.015666794	0.005967062	0.017686144	0.01025521	0.008059342	0.001190268	0.007848569	0.003164798	0.00280112	0.000821243	0.002179225	0.006043339	0.005279578	0.001550688	0.000279573	0.000475439	0.002286526	0.000236495	0.000319713	0.000410272	0.003475458	0.001999022	0.001125416	0.000689239	0.000522797
Bacteria;Firmicutes;Bacilli;Bacillales;Bacillaceae;Tumebacillus	5.55E-05	0.000107612	0.000764234	0.000755828	0.004250537	0.001311168	0.001483561	3.50E-05	0.000974659	0.000571951	0.000746965	0.000547495	0.000198111	0.000690667	0.000239981	0.000304599	6.71E-05	2.69E-05	0.00029969	4.58E-05	2.46E-05	1.52E-05	0.000398027	0.000206421	0.000157558	8.62E-05	0.00012382
Bacteria;Firmicutes;Bacilli;Bacillales;Other;Other	0.000499778	0.000968506	0.070436887	0.025618585	0.068301739	0.056427066	0.038291901	0.004586032	0.030881297	0.015709601	0.02054155	0.002463728	0.006801823	0.017266684	0.016078714	0.007365769	0.000570329	0.000511321	0.009312599	0.000717114	0.001069808	0.001200425	0.012892203	0.008213374	0.005829657	0.003015422	0.002283796
Bacteria;Firmicutes;Bacilli;Bacillales;Staphylococcaceae;Other	0.000907004	0.001004376	0.002547446	0.001074071	0.000683995	0.001170686	0.00585405	0.000735165	0.001744126	0.001753985	0.003174603	0.004653709	0.001254705	0.001467668	0.003239741	0.001052253	0.001364318	0.001587786	0.001076665	0.00121299	0.000971435	0.003662057	0.003989981	0.002053343	0.000697758	0.000732317	0.000811711
Bacteria;Firmicutes;Bacilli;Bacillales;Staphylococcaceae;Staphylococcus	0.000166593	0.000286965	0.000509489	0.000198902	0.00014657	0.000280965	0.000280674	0.000175039	0.000359085	0.000228781	0.000560224	0.00109499	0.000396223	0.000518001	0.000839933	0.000193836	0.000335488	0.000457498	0.000233092	0.000312784	0.00025823	0.000303905	0.000359195	0.000651855	0.000247592	0.000129232	0.00012382
Bacteria;Firmicutes;Bacilli;Lactobacillales;Lactobacillaceae;Other	0.000832963	0.00064567	0.005731754	0.002466386	0.003859683	0.001357996	0.002085004	0.000980221	0.000923361	0.001334553	0.002054155	0.004653709	0.000858482	0.002331002	0.002039837	0.000775344	0.00110711	0.001399404	0.000843573	0.001235877	0.000762392	0.002431241	0.013397018	0.002314086	0.001035383	0.000775394	0.001595906
Bacteria;Firmicutes;Bacilli;Lactobacillales;Lactobacillaceae;Pediococcus	0.00061084	0.000681541	0.004712775	0.002227703	0.004641391	0.001217513	0.003127506	0.000980221	0.000872063	0.000915122	0.002427638	0.0057487	0.000858482	0.002072002	0.002399808	0.000609199	0.001230122	0.001471169	0.000899071	0.001609692	0.001118995	0.003266981	0.002922103	0.002466185	0.001192941	0.001421556	0.002118702
Bacteria;Firmicutes;Bacilli;Lactobacillales;Leuconostocaceae;Leuconostoc	0.003368873	0.00746108	0.012991976	0.013923144	0.008843072	0.009833763	0.006936648	0.013338001	0.025135939	0.021962938	0.002427638	0.021626061	0.006999934	0.017698351	0.013678906	0.109434276	0.014973944	0.007696724	0.107089341	0.044338996	0.073706086	0.037122018	0.01107681	0.012004998	0.179774016	0.075816318	0.061277275
Bacteria;Firmicutes;Bacilli;Lactobacillales;Leuconostocaceae;Other	0.005923293	0.005237105	0.008533945	0.012968414	0.004299394	0.006789979	0.003849238	0.006791528	0.011952396	0.012582933	0.009710551	0.012318642	0.003235819	0.007511008	0.006839453	0.037853405	0.006016417	0.003292188	0.037205998	0.01580702	0.02561391	0.013265461	0.004339469	0.005019284	0.060029711	0.025932627	0.021255813
Bacteria;Firmicutes;Bacilli;Lactobacillales;Leuconostocaceae;Weissella	0.00188805	0.003766411	0.006495988	0.006563768	0.006302521	0.004870054	0.004290297	0.007176615	0.01728737	0.010333257	0.001680672	0.010402409	0.001056594	0.00302167	0.001559875	0.013097776	0.00129722	0.000923966	0.011743421	0.004165363	0.008140378	0.003054247	0.001310578	0.001901244	0.017714054	0.007710864	0.007608068
Bacteria;Firmicutes;Bacilli;Lactobacillales;Other;Other	0.014067822	0.014814549	0.017195262	0.016230408	0.009820207	0.010583002	0.008139535	0.011342552	0.018313327	0.014070007	0.023902894	0.05146455	0.014924388	0.019252353	0.023398128	0.036219644	0.011999284	0.013375076	0.035785244	0.013892174	0.023794007	0.103859596	0.021076033	0.020902819	0.047785181	0.023951064	0.022549047
Bacteria;Firmicutes;Bacilli;Lactobacillales;Streptococcaceae;Lactococcus	0.00320228	0.013989526	0.012864603	0.023231761	0.016318155	0.018262702	0.007778669	0.018239104	0.048835539	0.028635705	0.00410831	0.031480975	0.002575447	0.007424674	0.007199424	0.038434913	0.004708014	0.0033191	0.044054477	0.011923925	0.021924917	0.023324723	0.004805452	0.005855831	0.052579454	0.025803395	0.022659109
Bacteria;Firmicutes;Bacilli;Lactobacillales;Streptococcaceae;Streptococcus	0.000499778	0.000322835	0.000764234	0.00099451	0.000586281	0.000561929	0.000481155	0.000560126	0.001025957	0.000991383	0.001493931	0.003011224	0.00092452	0.001122334	0.000959923	0.000664581	0.000905817	0.001219994	0.000799174	0.000785774	0.000823875	0.002416046	0.01295045	0.001368896	0.0008103	0.000947704	0.000756679
Bacteria;Firmicutes;Bacilli;Other;Other;Other	0.001147638	0.000717412	0.001910585	0.001869679	0.002247411	0.00220089	0.001363272	0.00115526	0.001641531	0.001334553	0.004855275	0.007938681	0.00389619	0.007942675	0.006359491	0.002353723	0.003578538	0.00282572	0.004106867	0.003181239	0.003615213	0.009041179	0.008154706	0.008452387	0.002228324	0.001809253	0.001595906
Bacteria;Firmicutes;Clostridia;Clostridiales;Eubacteriaceae;Eubacterium	0.000907004	0.000753282	0.001783212	0.001034291	0.001074849	0.000702412	0.000801925	0.000910205	0.000820765	0.000648212	0.003548086	0.004379962	0.001320742	0.000949668	0.002159827	0.000858417	0.001710988	0.001704403	0.000754776	0.000999382	0.000946842	0.00176265	0.001728021	0.001922972	0.000607725	0.000990781	0.000715406
Bacteria;Firmicutes;Clostridia;Clostridiales;Other;Other	0.001055087	0.000681541	0.001910585	0.001670777	0.000830565	0.001123859	0.000882117	0.001190268	0.001590233	0.001029513	0.003921569	0.007391185	0.001188668	0.002072002	0.001319894	0.001412234	0.001364318	0.001605727	0.001909138	0.00121299	0.001352631	0.001929798	0.002786191	0.001760009	0.00148555	0.001292324	0.001306992
Bacteria;Firmicutes;Clostridia;Clostridiales;Veillonellaceae;Veillonella	0.000111062	0.000538059	0.000382117	0.000596706	0.000244284	0.000280965	0.000360866	0.000595134	0.001487637	0.000686342	0.000373483	0.00109499	0.000264148	0.000518001	0.000239981	0.001744524	0.000156561	0.000278087	0.00186474	0.000381444	0.000996028	0.000501444	0.001533861	0.000467163	0.001688125	0.001593866	0.000894257
Bacteria;Firmicutes;Erysipelotrichi;Erysipelotrichales;Erysipelotrichaceae;Other	0.000573819	0.000466318	0.000891606	0.000636487	0.001074849	0.00037462	0.000561347	0.000525118	0.000666872	0.000381301	0.000933707	0.003284971	0.000594334	0.001554002	0.000959923	0.000664581	0.000972915	0.001372493	0.000754776	0.000801031	0.000664019	0.002188117	0.00110671	0.001281982	0.000337625	0.000516929	0.00056407
Bacteria;Firmicutes;Other;Other;Other;Other	0.004849696	0.010832915	0.070564259	0.036836662	0.067178034	0.056239756	0.037890938	0.019184316	0.053452344	0.031686113	0.026890756	0.032849713	0.011094235	0.029008029	0.028317735	0.041425525	0.009304198	0.008970541	0.047661861	0.015814649	0.026683718	0.032730588	0.025269882	0.020348742	0.058521653	0.027095718	0.025699585
Bacteria;Proteobacteria;Alphaproteobacteria;Caulobacterales;Caulobacteraceae;Brevundimonas	0.000425737	0.000466318	0.008788689	0.006086403	0.013435607	0.01151955	0.008380112	0.001855417	0.005899251	0.005223824	0.006349206	0.002189981	0.003103744	0.005957006	0.001319894	0.003018304	0.00038022	0.000376763	0.004517554	0.000747629	0.000762392	0.000592615	0.005426763	0.003031126	0.002723508	0.000861549	0.00683763
Bacteria;Proteobacteria;Alphaproteobacteria;Other;Other;Other	0.000185103	0.000573929	0.002165329	0.000755828	0.001270276	0.000936549	0.000601443	0.00049011	0.002821381	0.000800732	0.003361345	0.000273748	0.000330186	0.000345334	0.000599952	0.000304599	0.000123012	9.87E-05	0.000133196	0.000160206	0.000159856	6.08E-05	0.000611603	0.000488891	0.000360133	0.000430775	0.000577828
Bacteria;Proteobacteria;Alphaproteobacteria;Rhizobiales;Methylobacteriaceae;Methylobacterium	0.000148082	0.000215223	0.002420074	0.000358024	9.77E-05	0.00018731	0.000160385	0.000455102	0.001641531	0.000571951	0.002987862	0	0.000594334	0.000431667	0.000599952	0.000941489	0.000246024	0.000233234	0.000821373	0.000366186	0.000590239	0.000379881	0.000766931	0.000130371	0.001147925	0.000861549	0.000770437
Bacteria;Proteobacteria;Alphaproteobacteria;Rhodospirillales;Acetobacteraceae;Gluconobacter	0.00192507	0.002618552	0.000254745	0.001312754	0.000928278	0.001357996	0.001483561	0.002870646	0.001077255	0.001296423	0.002427638	0.001368738	0.002179225	0.002158335	0.001559875	0.001993742	0.002974659	0.003390864	0.002020135	0.002685362	0.002385549	0.002416046	0.00211634	0.002661742	0.001553075	0.00254157	0.002531437
Bacteria;Proteobacteria;Alphaproteobacteria;Rhodospirillales;Acetobacteraceae;Other	0.073837554	0.0452328	0.024073366	0.022277031	0.033124878	0.019199251	0.039374499	0.067950289	0.043346671	0.024784565	0.046125117	0.015877361	0.048537278	0.026159026	0.02099832	0.04156398	0.039744135	0.042726686	0.034497686	0.054790549	0.057462219	0.040145874	0.041326887	0.042392308	0.029643468	0.079133282	0.111149327
Bacteria;Proteobacteria;Alphaproteobacteria;Sphingomonadales;Other;Other	0.002369317	0.002618552	0.001783212	0.003301774	0.002833692	0.001264341	0.001844427	0.003045685	0.003642146	0.003317319	0.000746965	0.008212428	0	0.000949668	0.000599952	0.000470745	0.000178927	0.000538232	0.000654879	0.000556908	0.000405789	0.00060781	0.000533939	0.000532348	0.001958225	0.003920048	0.003838428
Bacteria;Proteobacteria;Betaproteobacteria;Burkholderiales;Comamonadaceae;Other	0.002202725	0.003981634	0.023945994	0.030352454	0.054572992	0.05122922	0.043143545	0.012987922	0.035754591	0.021924807	0.017927171	0.012318642	0.014792313	0.023655357	0.014278858	0.00839033	0.000961732	0.000861172	0.017248843	0.001708867	0.001893683	0.00173226	0.009659444	0.005127927	0.021225353	0.006160076	0.007126544
Bacteria;Proteobacteria;Betaproteobacteria;Burkholderiales;Other;Other	0.001388272	0.00247507	0.124697491	0.039979314	0.116669924	0.108218216	0.061587811	0.011692631	0.056478917	0.033821399	0.040709617	0.007391185	0.016377204	0.042044375	0.039356851	0.003350594	0.000861086	0.000771467	0.005005938	0.001296908	0.002065836	0.001565112	0.045171249	0.013113151	0.005829657	0.003058499	0.002861624
Bacteria;Proteobacteria;Betaproteobacteria;Burkholderiales;Oxalobacteraceae;Other	0.003072708	0.005416457	0.003056935	0.008154984	0.004103967	0.004401779	0.003809142	0.005391213	0.002513594	0.008007321	0.000933707	0.011771147	0.000330186	0.002072002	0.000359971	0.000110763	0.000111829	0.000735584	0.000233092	0.000358557	0.000135263	0.000121562	0.001329994	0.000695312	0.000562708	0.001249246	0.001403296
Bacteria;Proteobacteria;Betaproteobacteria;Neisseriales;Neisseriaceae;Neisseria	0	7.17E-05	0	0	0	0	0	0	0	3.81E-05	0	0	0.000132074	0	0	2.77E-05	1.12E-05	8.97E-06	0	1.53E-05	0	3.04E-05	0.00370845	0	0	0	0
Bacteria;Proteobacteria;Betaproteobacteria;Other;Other;Other	0.000518288	0.001650047	0.041013884	0.01253083	0.032587454	0.027862327	0.017361668	0.004726063	0.020519134	0.011019599	0.012885154	0.002189981	0.005811266	0.011482345	0.011039117	0.004098247	0.000793988	0.000583085	0.005305629	0.001380826	0.002151913	0.001261207	0.01299899	0.003769895	0.006347349	0.003230809	0.002779077
Bacteria;Proteobacteria;Epsilonproteobacteria;Campylobacterales;Campylobacteraceae;Arcobacter	0.000203613	0.001004376	0.000891606	0.001630997	0.000977135	0.001498478	0.001002406	0.001120252	0.004103827	0.001563334	0.000373483	0.001916233	0.000264148	0.000777001	0.000239981	0.000498435	0.000145378	0.000152499	0.001032267	0.000244124	0.000516459	0.000182343	0.000116496	0.000141235	0.001440533	0.000646162	0.000632859
Bacteria;Proteobacteria;Gammaproteobacteria;Enterobacteriales;Enterobacteriaceae;Other	0.01458611	0.015209125	0.031206216	0.018975257	0.017930428	0.011940997	0.012028869	0.013758096	0.021186006	0.014222527	0.044631186	0.041609636	0.019282837	0.025036692	0.023758099	0.01387312	0.019212274	0.020300334	0.014740324	0.01391506	0.014792863	0.024981006	0.02142552	0.026802108	0.010331323	0.0118463	0.012271964
Bacteria;Proteobacteria;Gammaproteobacteria;Oceanospirillales;Halomonadaceae;Other	0.00758922	0.005021881	0.025983951	0.013962925	0.027408638	0.025146336	0.018203689	0.006196394	0.01231148	0.009494395	0.008776844	0.004379962	0.003499967	0.007252007	0.007559395	0.00321214	0.000849903	0.001471169	0.00341869	0.000724743	0.000676315	0.000516639	0.005853914	0.005345212	0.003488791	0.001464633	0.001086867
Bacteria;Proteobacteria;Gammaproteobacteria;Oceanospirillales;Halomonadaceae;Zymobacter	0.13581001	0.074646675	0.006878105	0.085488106	0.005960524	0.052821353	0.05096231	0.05177665	0.006104442	0.089033783	0.013258637	0.042157131	0.016443241	0.017784684	0.015238781	0.003599812	0.010735613	0.023978255	0.004484255	0.005149488	0.006295882	0.004801702	0.0120379	0.015850942	0.000900333	0.00254157	0.001114382
Bacteria;Proteobacteria;Gammaproteobacteria;Other;Other;Other	0.142473715	0.14251381	0.141255891	0.165128491	0.119259332	0.123343479	0.120368885	0.105268685	0.126756951	0.140776329	0.116713352	0.145359978	0.133791191	0.138651472	0.154907607	0.098551768	0.101753483	0.095616994	0.103592954	0.0812017	0.093688133	0.120179304	0.124446645	0.141582921	0.079386873	0.06004997	0.052733676
Bacteria;Proteobacteria;Gammaproteobacteria;Pasteurellales;Pasteurellaceae;Other	5.55E-05	0.000107612	0.000636862	0.000238682	0.000293141	0.00018731	0.000200481	0.000350079	0.000153894	0.00019065	0.000933707	0.000821243	0.00046226	0.001036001	0.000599952	0.000470745	0.000436134	0.000439556	0.000277491	0.000259382	0.000356603	0.000440663	0.006824713	0.000412842	0.000180067	0.00034462	0.000275156
Bacteria;Proteobacteria;Gammaproteobacteria;Pseudomonadales;Moraxellaceae;Acinetobacter	0.004960758	0.016213502	0.034263151	0.033097303	0.025454368	0.039288223	0.02149158	0.018274112	0.054324408	0.029665218	0.007469655	0.037503422	0.002839596	0.011223345	0.010199184	0.026306316	0.003746282	0.002574545	0.029758139	0.009002067	0.01645291	0.006913843	0.006106322	0.006714107	0.042023049	0.020849487	0.016247971
Bacteria;Proteobacteria;Gammaproteobacteria;Pseudomonadales;Moraxellaceae;Enhydrobacter	0.000425737	0.001291341	0.00165584	0.003540457	0.001563416	0.001264341	0.001603849	0.001330299	0.00379604	0.003279189	0.000186741	0.004106214	6.60E-05	0.001295001	0.000359971	0.00193836	0.00019011	0.000206322	0.001631647	0.001777527	0.000873062	0.000425467	0.000232992	0.000249878	0.002273341	0.000861549	0.000729164
Bacteria;Proteobacteria;Gammaproteobacteria;Pseudomonadales;Moraxellaceae;Other	0.000869984	0.003622928	0.011972997	0.006683109	0.012263045	0.010770311	0.007297514	0.003990898	0.010413461	0.005719515	0.002240896	0.004106214	0.000990557	0.00353967	0.003239741	0.007808822	0.001140659	0.000672791	0.007991742	0.002479383	0.004070189	0.00205136	0.002291084	0.001673095	0.010128748	0.005901611	0.004127342
Bacteria;Proteobacteria;Gammaproteobacteria;Pseudomonadales;Pseudomonadaceae;Other	0.002702503	0.004555564	0.039867533	0.013405999	0.035665429	0.023273238	0.024659182	0.005076142	0.017902944	0.013955617	0.015499533	0.003832466	0.003566004	0.014245014	0.012598992	0.001550688	0.00064861	0.000385733	0.001664946	0.000518763	0.000700909	0.000516639	0.009620612	0.005671139	0.003488791	0.003101577	0.002957929
Bacteria;Proteobacteria;Other;Other;Other;Other	0.525451651	0.573283593	0.135906254	0.3281884	0.218536252	0.252868181	0.392822775	0.550883949	0.293885298	0.39323572	0.382446312	0.194087052	0.599616985	0.457221791	0.452603792	0.440340044	0.683400058	0.668646166	0.406391174	0.655663292	0.556054253	0.469670263	0.479360826	0.531989788	0.306766003	0.548849832	0.552045786
