# Supplementary material for: Next-Generation Sequencing Reveals Significant Bacterial Diversity of Botrytized Wine
Source: PLoS One. 2012 May 1;7(5):e36357. doi: 10.1371/journal.pone.0036357 (PMC3341366; doi:10.1371/journal.pone.0036357)
Supplement: Table S6 — BAS genus-level taxonomy for V5 5′ reads. (XLS) [file pone.0036357.s008.xls]

## Sheet: Sheet1
Table S6: BAS genus-level taxonomy for V5 5’ reads
Batch	1	1	2	2	3	2	1	1	3	2	P	P	4	4	4	4	4	4	4	4	4	4	4	4	4	5	5	5
Age (wk)	1	6	11	6	17	19	19	51	51	51	0	0	10	17	21	59	26	6	1	64	38	49	32	9	12	19	6	51
Bacteria;Actinobacteria;Bacteria;Actinobacteria;Actinomycetales;Microbacteriaceae;Other	0.00185529	0.000938967	0.0134862	0.00207039	0.000550661	0.00195331	0.00120021	0	0.00624851	0	0.00139868	0.0172	0.000784468	0.000591716	0.000101492	0	0.00184928	0.000422565	0.00133923	0.000238572	8.2447e-05	0	0.00028445	0.047138	0.00182639	0.0011354	0.000144606	0
Bacteria;Actinobacteria;Bacteria;Actinobacteria;Actinomycetales;Micrococcaceae;Other	0	0	0.000449539	0	0	0.000837131	0	0	0	0	0.000371991	0.0024	0.000416748	0	0	0	0	9.05496e-05	0.000468729	4.77145e-05	0	0	0.000126422	0.00610269	0.00124153	0	0.000144606	0
Bacteria;Actinobacteria;Bacteria;Actinobacteria;Actinomycetales;Other;Other	0.000371058	0.000625978	0.00382108	0.0026225	0.00495595	0.00102316	0.00127522	0	0.0024399	0.00290867	0.000877898	0.004	0.000759953	0	0.00172536	0.00348837	0.000924642	0.000633847	0.00200884	0.000604383	0.000412235	0	0.00145386	0.0172559	0.00507901	0.0011354	0.00106045	0.00070159
Bacteria;Actinobacteria;Bacteria;Actinobacteria;Other;Other;Other	0.000494743	0	0	0.000138026	0	0	7.50131e-05	0.0013089	0.000297548	0.0017452	0	0	0.000294175	0	0.000101492	0	0	0.000633847	0.000200884	0.00135191	8.2447e-05	0	6.32111e-05	0.00231481	0.000543813	0	4.82021e-05	0.000233863
Bacteria;Bacteroidetes;Bacteroidia;Bacteroidales;Bacteroidaceae;Bacteroides	0.00247372	0.00250391	0.0105642	0.00207039	0.00220264	0	0.00337559	0.0013089	0.00339205	0	0.0023361	0.0088	0.000465778	0.0911243	0.00192835	0.00232558	0.00416089	0.000181099	0.00160707	0.00338773	0.000412235	0	0.0204172	0.000210438	0.00149805	0.00510928	0.00192808	0.00140318
Bacteria;Bacteroidetes;Bacteroidia;Bacteroidales;Other;Other	0	0	0	0	0	0	0	0	0	0.0034904	0	0	0.00142185	0	0	0	0	0	0	0	0.00214362	0	0.000410872	0.0151515	1.02606e-05	0	0	0
Bacteria;Bacteroidetes;Bacteroidia;Bacteroidales;Prevotellaceae;Other	0	0.000312989	0.000674309	0.000276052	0	0	7.50131e-05	0	0.000119019	0	2.97592e-05	0	0.000220631	0	0.000202984	0.00465116	0.000462321	0	0	0.001002	8.2447e-05	0	6.32111e-05	0.0016835	0.00103632	0.00198694	0.00024101	0
Bacteria;Bacteroidetes;Flavobacteria;Flavobacteriales;Flavobacteriaceae;Chryseobacterium	0	0.00125196	0.002922	0	0.00110132	0	0.000675118	0	0.00386813	0.00290867	0	0.0252	0	0	0	0	0	0.000392382	0.000334806	0	0	0.0322581	0	0.00147306	0	0	0	0
Bacteria;Bacteroidetes;Flavobacteria;Flavobacteriales;Flavobacteriaceae;Other	0.000618429	0.00156495	0.00584401	0.000552105	0.00385463	0.00213934	0.000450079	0.0078534	0.00232088	0.000581734	0.00101181	0.0036	0.000735438	0.00295858	0.00152238	0.00348837	0.00184928	0.000573481	0.000468729	0.00353087	0.000329788	0.0322581	0.0005689	0.00799663	0.000584855	0.00255464	0.000578425	0.000467727
Bacteria;Bacteroidetes;Other;Other;Other;Other	0	0.00406886	0.0179816	0.000966184	0.00110132	0.00362757	0.00195034	0	0.0158296	0.000581734	8.92777e-05	0.0028	0.000220631	0.000591716	0	0	0.00184928	0.00368235	0.0012053	0.000254477	0	0.0645161	0.000948167	0.00547138	0.00331418	0.0011354	9.64041e-05	0
Bacteria;Bacteroidetes;Sphingobacteria;Sphingobacteriales;Other;Other	0.000123686	0.000312989	0.00202293	0.000138026	0	0	0.000375066	0	0.000297548	0	1.48796e-05	0.0004	0.000441263	0	0.000608952	0	0	3.01832e-05	0	3.18097e-05	0.000164894	0	0.000158028	0.00294613	0.000318079	0.000283849	4.82021e-05	0
Bacteria;Firmicutes;Bacilli;Bacillales;Other;Other	0.000989487	0.000312989	0.000674309	0.00151829	0.00110132	0.00176728	0.000825144	0	0.00136872	0.000581734	0.00174092	0.0036	0.000122573	0.00118343	0.000913427	0	0.000924642	0.00190154	0.00214276	0.00108153	0.000906917	0	0.00420354	0.0136785	0.00162118	0.000283849	0.000964041	0.00070159
Bacteria;Bacteria;Firmicutes;Bacilli;Lactobacillales;Leuconostocaceae;Leuconostoc	0.00791589	0	0.023376	0.0194617	0	0.0235327	0.0127522	0.0091623	0.0424899	0.0319953	0.0037943	0.0072	0.00693763	0	0.00649548	0.225581	0.0166436	0.00126769	0.00689701	0.00865223	0.0236623	0	0.0734829	0.00757576	0.061851	0.167755	0.00342235	0.00163704
Bacteria;Bacteria;Firmicutes;Bacilli;Lactobacillales;Leuconostocaceae;Fructobacillus	0	0	0	0	0	0.000744117	0.000150026	0	5.95096e-05	0.000581734	0.00123501	0.0004	0.000686409	0.000591716	0.000608952	0	0.000924642	0.000513115	0.000334806	0	0	0.0322581	0	0.000210438	0	0	9.64041e-05	0
Bacteria;Bacteria;Firmicutes;Bacilli;Lactobacillales;Leuconostocaceae;Weissella	0.00470006	0	0.0271971	0	0	0	0.000150026	0.0078534	0.03398	0	0	0	0.00151991	0	0.00568355	0	0.00462321	3.01832e-05	0.00261149	4.77145e-05	0.00313299	0	0.011378	0.00968013	1.02606e-05	0.00965087	0.00380796	0
Bacteria;Bacteria;Firmicutes;Bacilli;Lactobacillales;Leuconostocaceae;Other	0	0.000312989	0	0.000138026	0	0	7.50131e-05	0	0	0.0122164	0.0120971	0.0212	0	0	0	0	0	0	0	0	0	0	6.32111e-05	0	0	0	0	0
Bacteria;Bacteria;Firmicutes;Bacilli;Lactobacillales;Streptococcaceae;Lactococcus	0.00791589	0.02723	0.0305687	0.0140787	0.0154185	0.0236257	0.0360063	0.0287958	0.114973	0.0482839	0.00452341	0.0552	0.00203471	0.0177515	0.018573	0.0267442	0.00832178	0.00398418	0.00421856	0.00707765	0.00634842	0.0322581	0.0153603	0.00357744	0.341597	0.020721	0.017642	0.0123948
Bacteria;Bacteria;Firmicutes;Bacilli;Lactobacillales;Streptococcaceae;Streptococcus	0	0	0	0	0	0	0	0	0.000833135	0	0	0	0	0	0	0	0.0023116	0	0	3.18097e-05	0	0	0.000821745	0	0	0	0	0
Bacteria;Bacteria;Firmicutes;Bacilli;Lactobacillales;Other;Other	0.000371058	0.0244131	0.0074174	0.00828157	0.0253304	0	0.000225039	0	0.000238039	0	0.0209951	0	0.00063738	0.0313609	0.00172536	0.0255814	0.00138696	0.00102623	0.00180796	0.0029583	0.00082447	0	0.00474083	0.00694444	0.00065668	0.000283849	0.00891738	0.000467727
Bacteria;Firmicutes;Bacilli;Other;Other;Other	0.000494743	0.00594679	0.0629355	0.000138026	0.0446035	0.0302297	0.0211537	0.0026178	0.0164842	0.0104712	0.011621	0.0076	0.014341	0.0230769	0.0088298	0.00581395	0.0175682	0.00461803	0.0194188	0.000588479	0.0179735	0.0322581	0.10079	0.0538721	0.0410322	0.000567698	0.000723031	0.0070159
Bacteria;Firmicutes;Clostridia;Clostridiales;Clostridiaceae;Other	0.000123686	0.000312989	0.0022477	0	0.00110132	0	0	0	0	0	0.000297592	0	4.90292e-05	0	0	0.00116279	0	0.000513115	0.000133923	3.18097e-05	0	0	0	0.0016835	0.00016417	0	0	0.000233863
Bacteria;Firmicutes;Clostridia;Clostridiales;Lachnospiraceae;Other	0	0.000312989	0	0	0	0.000279044	0.000150026	0	0.000297548	0	0	0.0004	0.000122573	0	0	0	0.000462321	6.03664e-05	0	7.95241e-05	0	0	0.000158028	0.000420875	9.23456e-05	0.000851547	0	0.000233863
Bacteria;Firmicutes;Clostridia;Clostridiales;Other;Other	0.000247372	0.00125196	0.00269724	0.00690131	0.00165198	0.000372058	0.000450079	0	0.00196382	0.000581734	0.000163676	0.006	0.000588351	0.00236686	0.000101492	0.00581395	0.000462321	0.000875313	0.000937458	0.000524859	0.00115426	0	0.010177	0.00378788	0.00100554	0.00170309	0.00154247	0.000935454
Bacteria;Firmicutes;Clostridia;Clostridiales;Veillonellaceae;Other	0.00123686	0	0	0	0	0.00288345	0	0.0013089	0	0	0	0	4.90292e-05	0	0.00142089	0	0.000924642	0	0	0.00550307	0	0	3.16056e-05	0.00294613	0.000523292	0	0	0
Bacteria;Firmicutes;Clostridia;Other;Other;Other	0	0	0	0.000138026	0.000550661	0	0.000225039	0	0	0.000581734	0.000535666	0	0.000858011	0	0	0.00116279	0	0	0.000133923	0.000588479	8.2447e-05	0	3.16056e-05	0.00189394	0.000389904	0.000283849	0.000192808	0
Bacteria;Firmicutes;Other;Other;Other;Other	0.0127396	0.00657277	0	0.0187716	0.00330396	0.00492977	0.00262546	0.0026178	0.00136872	0.0122164	0.00116061	0.002	0.00112767	0.0153846	0.0100477	0.00465116	0.0120203	0.00129788	0.00616044	0.0399688	0.0128617	0.0322581	0.00120101	0.0290404	0.0368664	0.0661368	0.000578425	0.005145
Bacteria;Proteobacteria;AlphaBacteria;Proteobacteria;Other;Other;Other	0.000123686	0.000938967	0.00112385	0.000690131	0	0.00158125	0.00165029	0	0.00446322	0	0.000743981	0.004	0.000416748	0.000591716	0.000405968	0	0	0.000332015	0.00214276	0.000397621	0.000577129	0	0.00028445	0.00126263	0.00248307	0.00141924	0	0
Bacteria;Proteobacteria;AlphaBacteria;Proteobacteria;Rhizobiales;Other;Other	0.000247372	0.000625978	0.000449539	0.000276052	0.000550661	0.000372058	0.000375066	0	5.95096e-05	0	0.000282713	0	9.80584e-05	0.000591716	0.000202984	0.00116279	0.000462321	9.05496e-05	0	3.18097e-05	0.000164894	0	0.000158028	0.00294613	0.000102606	0	9.64041e-05	0.000233863
Bacteria;Proteobacteria;AlphaBacteria;Proteobacteria;Rhizobiales;Phyllobacteriaceae;Other	0	0	0	0	0	9.30146e-05	0	0	0	0	0	0	0	0	0	0	0	0	0	0	0	0.0322581	0	0	2.05212e-05	0	0	0
Bacteria;Proteobacteria;AlphaBacteria;Proteobacteria;Rhodobacterales;Rhodobacteraceae;Other	0.000123686	0	0.00022477	0	0.000550661	0.000465073	0.000150026	0	0.000833135	0.000581734	8.92777e-05	0.0016	0.000196117	0	0.000710444	0	0.000462321	0	0.000334806	0.000699812	0	0	0.000410872	0.000841751	0.000790068	0.000283849	0.000385617	0.000233863
Bacteria;Proteobacteria;AlphaBacteria;Proteobacteria;Rhodospirillales;Acetobacteraceae;Gluconacetobacter	0	0	0	0.000276052	0.0468062	0.0370198	0.104493	0.0013089	0	0.0203607	0.0295212	0.022	0.000465778	0	0	0	0.00138696	0.0111678	0.000200884	0.000349906	0.0721411	0	0	0.00126263	5.13031e-05	0.000283849	0	0.000467727
Bacteria;Proteobacteria;AlphaBacteria;Proteobacteria;Rhodospirillales;Acetobacteraceae;Gluconobacter	0	0	0	0	0	0	7.50131e-05	0	0.3908	0	0	0	4.90292e-05	0	0	0	0	0	0	3.18097e-05	0.000247341	0.0322581	0	0.0180976	0	0	0	0.000233863
Bacteria;Proteobacteria;AlphaBacteria;Proteobacteria;Rhodospirillales;Acetobacteraceae;Other	0.835127	0.781847	0.603731	0.641132	0.48293	0.569993	0.720426	0.708115	0.157701	0.642816	0.723388	0.404	0.796847	0.612426	0.80067	0.451163	0.771613	0.774048	0.772666	0.727375	0.706653	0.0322581	0.507617	0.0361953	0.0379848	0.445927	0.880362	0.88985
Bacteria;Proteobacteria;AlphaBacteria;Proteobacteria;Rhodospirillales;Other;Other	0.00111317	0	0	0	0	0	0	0	5.95096e-05	0	0	0	2.45146e-05	0	0.000101492	0	0	0.0246597	0.0123878	0.000286287	0	0	0	0	2.05212e-05	0.000283849	0	0
Bacteria;Proteobacteria;AlphaBacteria;Proteobacteria;Sphingomonadales;Other;Other	0.000371058	0	0.000899078	0	0.000550661	0	7.50131e-05	0	0.000238039	0.000581734	7.43981e-05	0.002	0	0.000591716	0	0	0	3.01832e-05	0	0	8.2447e-05	0	6.32111e-05	0.00126263	4.10425e-05	0	4.82021e-05	0.000233863
Bacteria;Proteobacteria;AlphaBacteria;Proteobacteria;Sphingomonadales;Sphingomonadaceae;Sphingomonas	0	0	0	0	0	0.0013022	0	0	0	0	0	0	0	0	0.000101492	0	0	0	0	0	0	0	0	0.00462963	0	0	0	0
Bacteria;Proteobacteria;BetaBacteria;Proteobacteria;Burkholderiales;Burkholderiaceae;Other	0.000123686	0	0.000449539	0	0	0.000744117	0	0	0.000654606	0	8.92777e-05	0	2.45146e-05	0	0	0	0	0	6.69613e-05	0	0	0	0.000316056	0.00378788	0	0.000283849	0	0.000233863
Bacteria;Proteobacteria;BetaBacteria;Proteobacteria;Burkholderiales;Comamonadaceae;Other	0.00235003	0	0.0112385	0.00828157	0.00550661	0.00809227	0.00517591	0.013089	0.0138062	0.0052356	0.000104157	0.0176	0.000588351	0.00236686	0.00233431	0.00465116	0.000462321	0.000211282	0.00200884	0.00302192	0.00239096	0	0.00243363	0.0130471	0.00540735	0.00652853	0.00250651	0.000467727
Bacteria;Proteobacteria;BetaBacteria;Proteobacteria;Burkholderiales;Other;Other	0.000247372	0.00625978	0.002922	0.0124224	0.00220264	0.00530183	0.000300053	0	0.00499881	0.00465387	0.000639824	0.0108	0.000686409	0.00118343	0.00050746	0	0.00184928	0.000573481	0.000334806	0.00521678	0.00131915	0	0.000821745	0.00231481	0.0010158	0	0.000626627	0.00327409
Bacteria;Proteobacteria;BetaBacteria;Proteobacteria;Burkholderiales;Oxalobacteraceae;Other	0.00729746	0.00500782	0.00944032	0.0231884	0.0115639	0.0175798	0.00555097	0.0143979	0.00708165	0.0168703	0.00633872	0.0912	0.000833497	0	0.00223282	0.00116279	0.000462321	0.00114696	0.00113834	0.000970194	0	0.0645161	0.000726928	0.082702	0.00443259	0.00312234	0.000915839	0.00210477
Bacteria;Proteobacteria;BetaBacteria;Proteobacteria;Neisseriales;Neisseriaceae;Other	0.000618429	0	0.00179816	0.000414079	0.000550661	0.00213934	0.000375066	0.0013089	0.00279695	0.00116347	0	0.0052	0.000269661	0	0.000101492	0	0.000462321	0.000362199	0.000401768	0.00109743	0.000577129	0	0.000726928	0.0016835	0.000174431	0.00227079	0.000192808	0
Bacteria;Proteobacteria;BetaBacteria;Proteobacteria;Neisseriales;Neisseriaceae;Vitreoscilla	0	0	0.0022477	0.000690131	0.00110132	0.000837131	0	0	0.000952154	0	0.000133917	0	0	0.000591716	0	0	0.000462321	0	0.000133923	0.000270382	0	0.0322581	0	0	0	0	0.000433819	0.00187091
Bacteria;Proteobacteria;BetaBacteria;Proteobacteria;Other;Other;Other	0.000865801	0	0.00022477	0.00510697	0.00110132	0.00344154	0.00180032	0.0013089	0.00160676	0	0.000223194	0.0032	2.45146e-05	0	0.000304476	0	0.00184928	0.000301832	0.00274541	0.00147915	0.000164894	0.0322581	0.0005689	0.00189394	0.00242151	0	0	0
Bacteria;Proteobacteria;EpsilonBacteria;Proteobacteria;Campylobacterales;Campylobacteraceae;Arcobacter	0.000247372	0.000312989	0.000674309	0.00179434	0.00165198	0.000837131	0.000150026	0	0.00136872	0.00116347	0.000282713	0.0084	0.000122573	0	0.000405968	0	0	0.000513115	0.000200884	0.00119286	0.000164894	0.0322581	0.000442478	0.000210438	0.000205212	0	0.000482021	0.00163704
Bacteria;Proteobacteria;GammaBacteria;Proteobacteria;Aeromonadales;Aeromonadaceae;Aeromonas	0	0	0.00314677	0	0	0	0	0	0.0043442	0	0	0	0	0	0	0.00348837	0	9.05496e-05	0.000200884	0.000604383	0	0.0322581	0	0	0	0.000567698	9.64041e-05	0
Bacteria;Proteobacteria;GammaBacteria;Proteobacteria;Enterobacteriales;Enterobacteriaceae;Other	0.0157081	0.00156495	0.0339402	0.021256	0.00165198	0.00772021	0.00667617	0.0065445	0.00767674	0	0.0102223	0.0088	0.00122573	0.00591716	0.0075104	0.0255814	0.00554785	0.000452748	0.00220972	0.00806375	0.00379256	0.0322581	0.0120417	0.0273569	0.001929	0.00879932	0.00795334	0.00210477
Bacteria;Proteobacteria;GammaBacteria;Proteobacteria;Oceanospirillales;Halomonadaceae;Other	0	0	0	0.0335404	0	0	0	0	0	0	0	0	0	0	0	0	0.00277393	0	0	0	0	0	0	0.000210438	0	0	0	0.000233863
Bacteria;Proteobacteria;GammaBacteria;Proteobacteria;Other;Other;Other	0.0554113	0.056964	0.0101146	0.0414079	0.00550661	0.100921	0.0258045	0.0274869	0.0422518	0.0814427	0.0216796	0.0568	0.072171	0.0887574	0.0661727	0.0360465	0.0263523	0.0462105	0.0534351	0.0379966	0.0369363	0.0322581	0.0655183	0.179293	0.0240919	0.0278172	0.0148462	0.0159027
Bacteria;Proteobacteria;GammaBacteria;Proteobacteria;Pseudomonadales;Moraxellaceae;Acinetobacter	0.00185529	0.00375587	0.0173073	0.00648723	0.00881057	0	0.00202535	0.0052356	0	0.0122164	0	0.0028	0.0010051	0	0.00314625	0.0151163	0.00647249	0.000362199	0.00200884	0.00310144	0	0	0.0163717	0.00378788	0.00604351	0	0	0.00163704
Bacteria;Proteobacteria;GammaBacteria;Proteobacteria;Pseudomonadales;Moraxellaceae;Other	0	0	0	0	0	0.0113478	0	0	0.0138062	0	0.00178555	0	0	0	0	0	0	0	0	0.0082387	0	0	0	0	0	0	0.00197628	0
Bacteria;Proteobacteria;GammaBacteria;Proteobacteria;Xanthomonadales;Xanthomonadaceae;Other	0.000989487	0.00156495	0.00696786	0.00372671	0.00165198	0.00427867	0.00307554	0.0039267	0.00934301	0.00290867	0.000446389	0.0048	0.000147088	0	0.000202984	0	0	0.000120733	0.000133923	0.000270382	0.000247341	0	0.000347661	0.00420875	0.000564334	0.000567698	0	0.000233863
Bacteria;Proteobacteria;Other;Other;Other;Other	0.00692641	0.00876369	0.0296696	0.0244306	0.25826	0.0222305	0.00930163	0.0431937	0.0237443	0.0290867	0.0196857	0.0236	0.00566288	0.00473373	0.00527758	0.0104651	0.0152566	0.0522471	0.0157359	0.0263066	0.0056064	0	0.019469	0.0559764	0.0268418	0.0119217	0.00906199	0.00982226
